# Supplementary material
Source: Springer Nature journal article supplement (https://www.springermedizin.de/resource/supplementary/12936_2012_2609_MOESM7_ESM.pdf/9543310)

**A****EBA-175**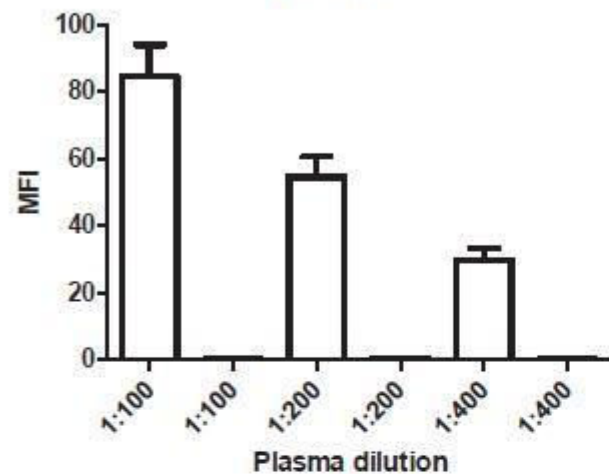**B****EBA-175**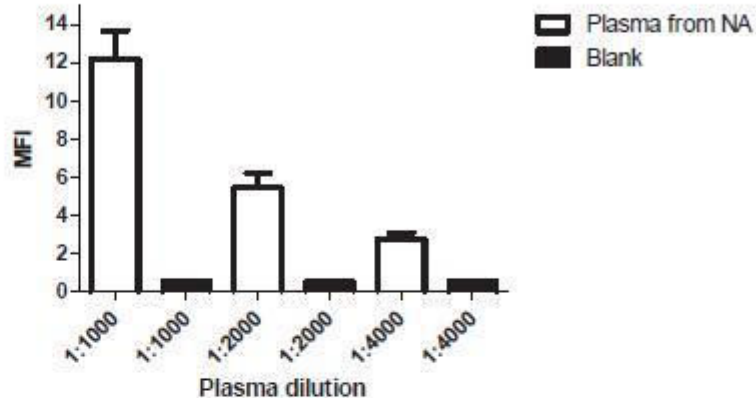**C****GLURP-R2**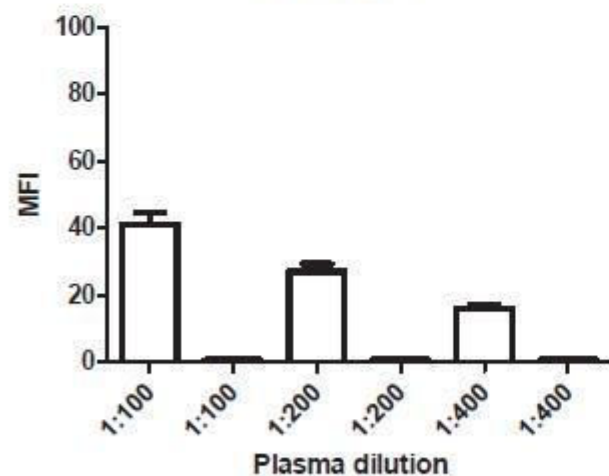**D****GLURP-R2**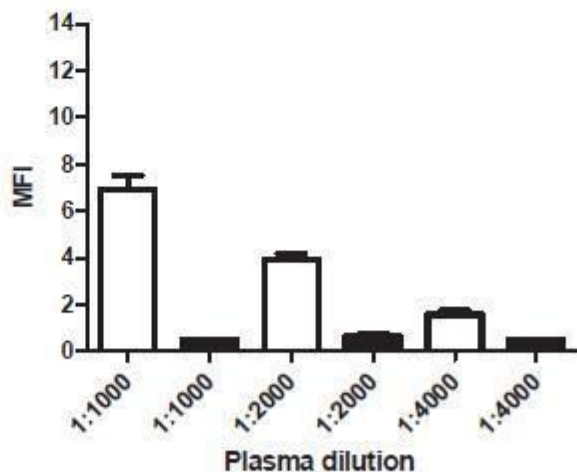

Supplement: MOESM7 [file 9543310]
